# Supplementary material for: Optical properties of two fluorene derived BODIPY molecular rotors as fluorescent ratiometric viscosity probes
Source: Royal Society of Chemistry journal article supplement (doi:10.1039/c5nj03339j), 2016-01-01
Supplement: c5nj03339j1.pdf [file c5nj03339j1.pdf]

## Supporting Information

### Optical Properties of two fluorene derived BODIPY molecular rotors as fluorescent ratiometric viscosity probes

Elba Xochitiotzi-Flores,<sup>a,‡</sup> Arturo Jiménez-Sánchez,<sup>b,‡</sup> Héctor García-Ortega,<sup>a</sup> Nuria-Sanchez Puig,<sup>c</sup> Margarita Romero-Ávila,<sup>a</sup> Rosa Santillan,<sup>d</sup> Norberto Farfán<sup>a\*</sup>

<sup>a</sup>Facultad de Química, Departamento de Química Orgánica, <sup>b</sup> Departamento de Química Inorgánica y Nuclear, Universidad Nacional Autónoma de México, 04510, México, D. F., México.

<sup>c</sup>Departamento de Química de Biomacromoléculas, Instituto de Química, Universidad Nacional Autónoma de México, Circuito Exterior s/n, Ciudad Universitaria, 04510, México, D. F., México.

<sup>d</sup>Departamento de Química, Centro de Investigación y de Estudios Avanzados del IPN, Apdo. Postal 14-740, 07000, México, D. F., México.

‡ These authors contributed equally.

All NMR spectra were acquired in chloroform.

**Figure S1.**  $^1\text{H}$  NMR spectrum of compound **1**, at 500 MHz.

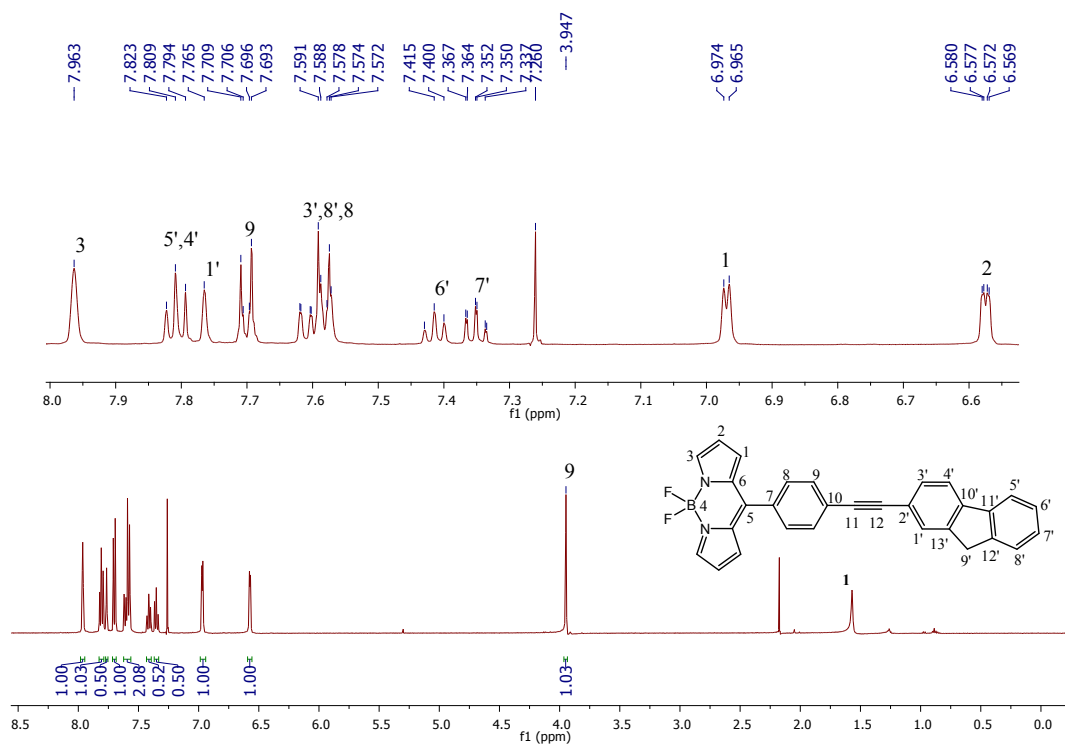

**Figure S2.**  $^{13}\text{C}$  NMR spectrum of compound **1**, at 125 MHz.

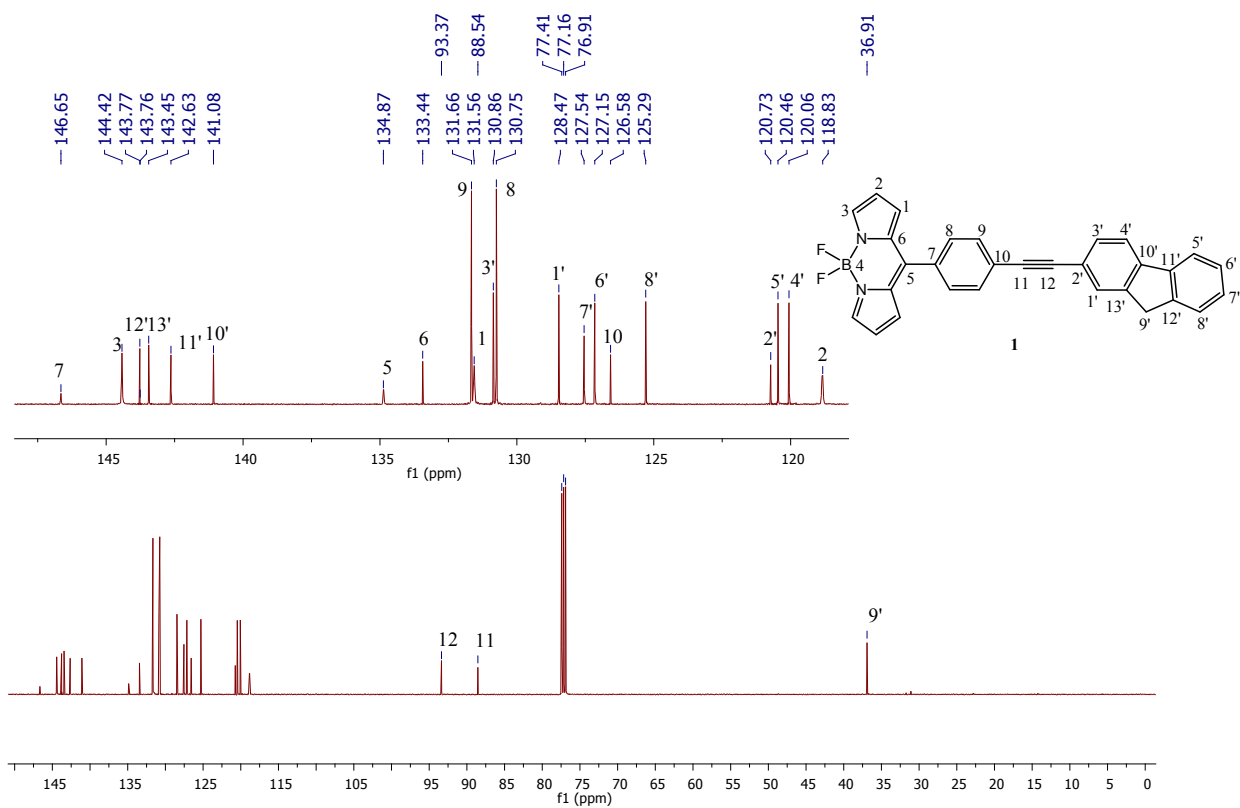

**Figure S3.** HSQC NMR spectrum of compound **1**, at 500 MHz.

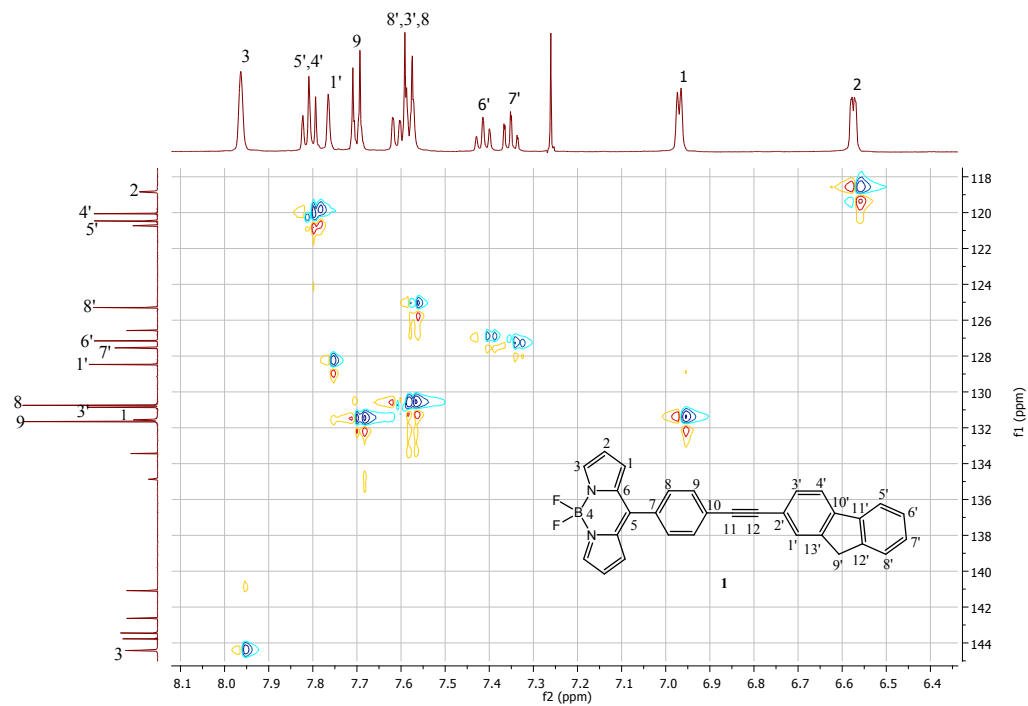

**Figure S4.**  $^{11}\text{B}$ ,  $^{19}\text{F}$  NMR spectra of compound **1**, at 160 and 470 MHz respectively.

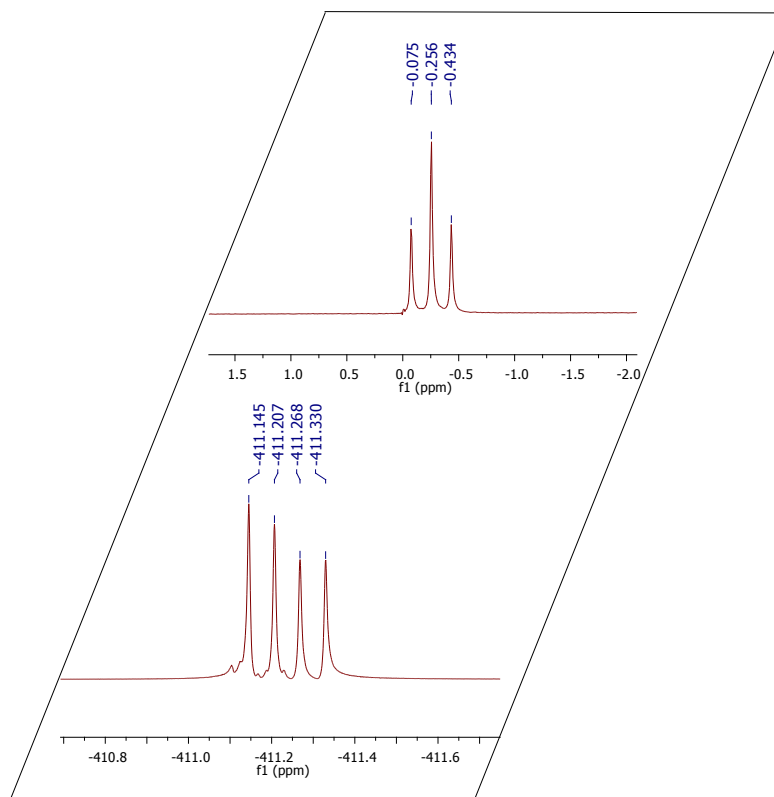

Figure S5.  $^1\text{H}$  NMR spectrum of compound **2**, at 500 MHz.

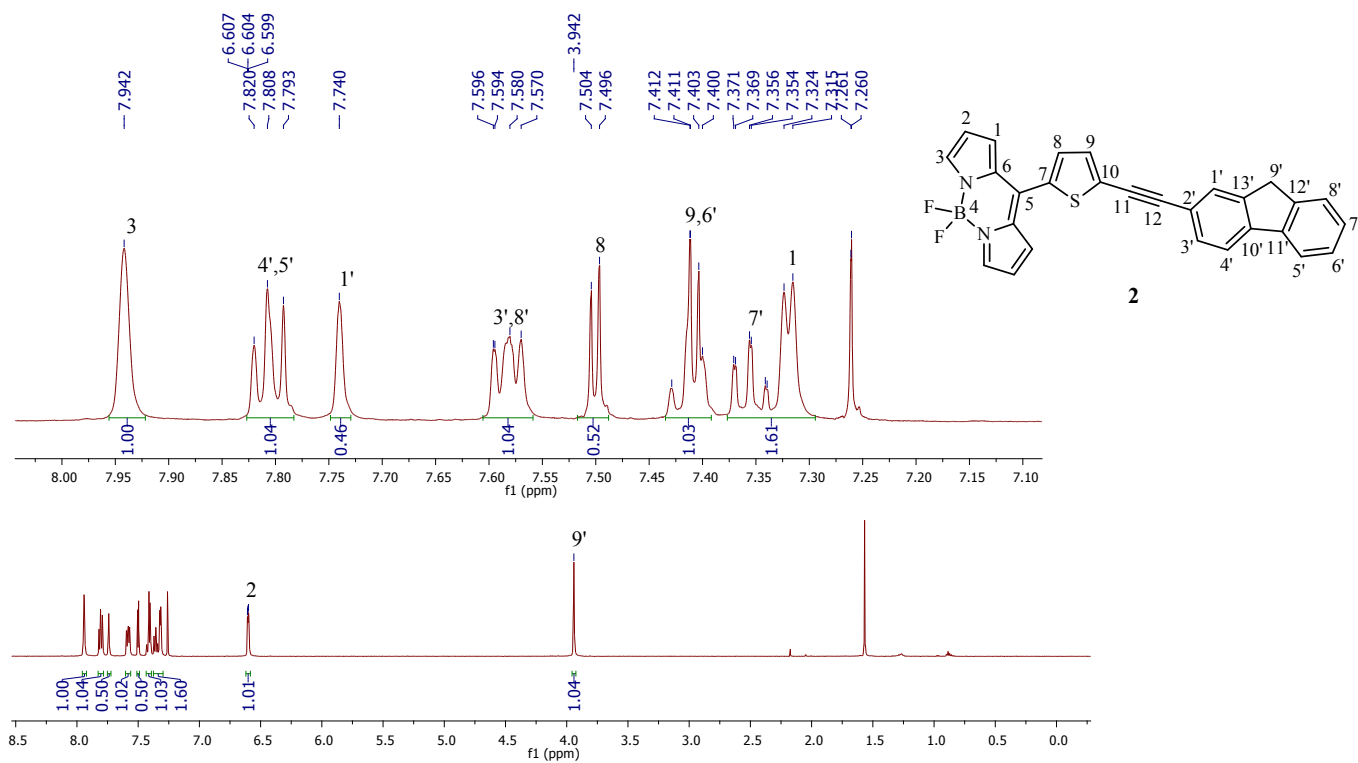

Figure S6.  $^{13}\text{C}$  NMR spectrum of compound **2**, at 125 MHz.

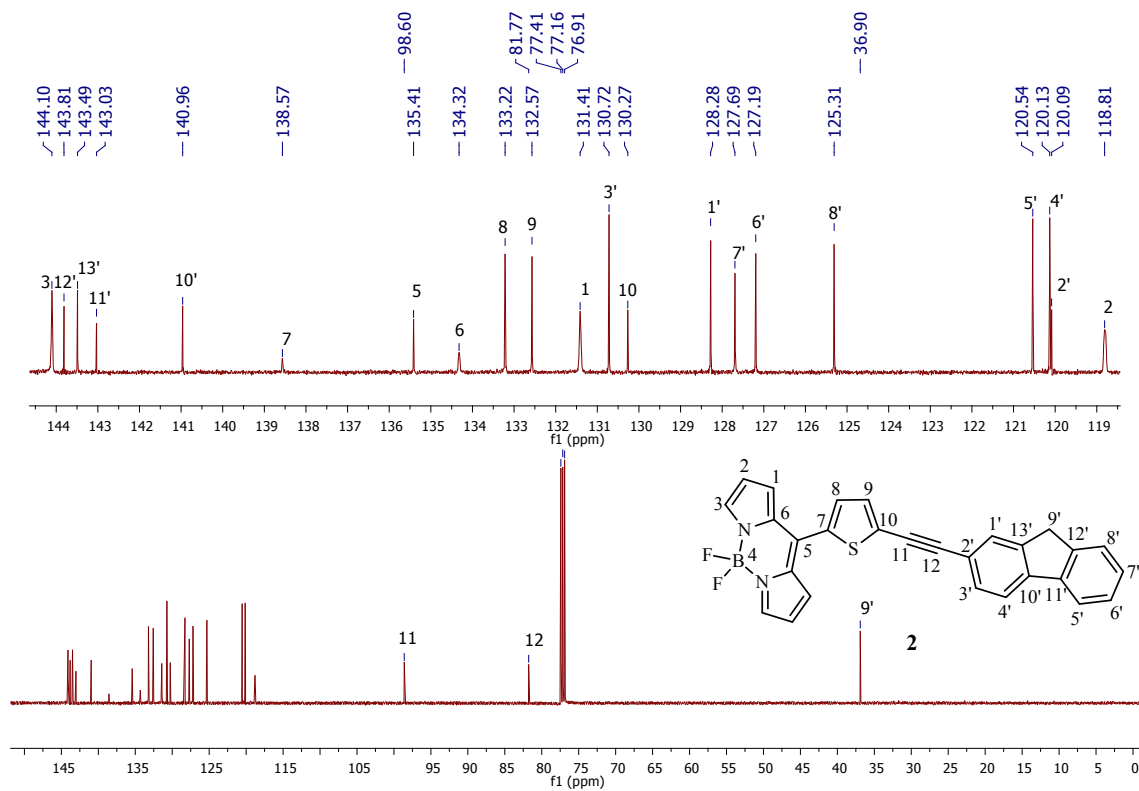

Figure S7. HSQC NMR spectrum of compound **2**, at 500 MHz.

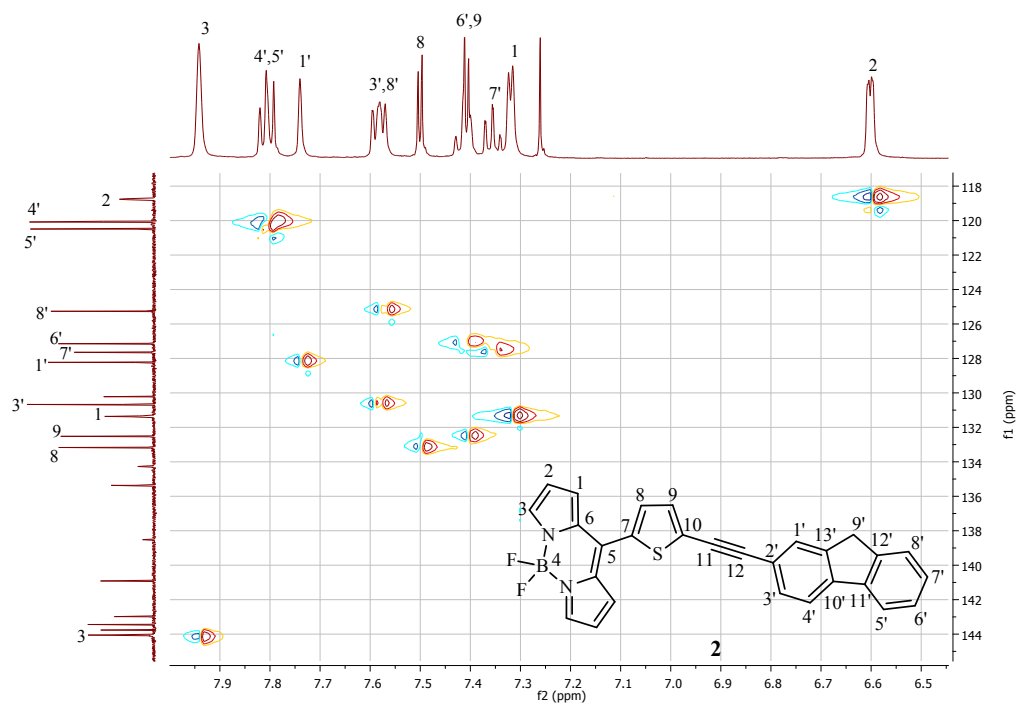

**Figure S8.**  $^{11}\text{B}$ ,  $^{19}\text{F}$  NMR spectra of compound **2**, at 160 and 470 MHz respectively.

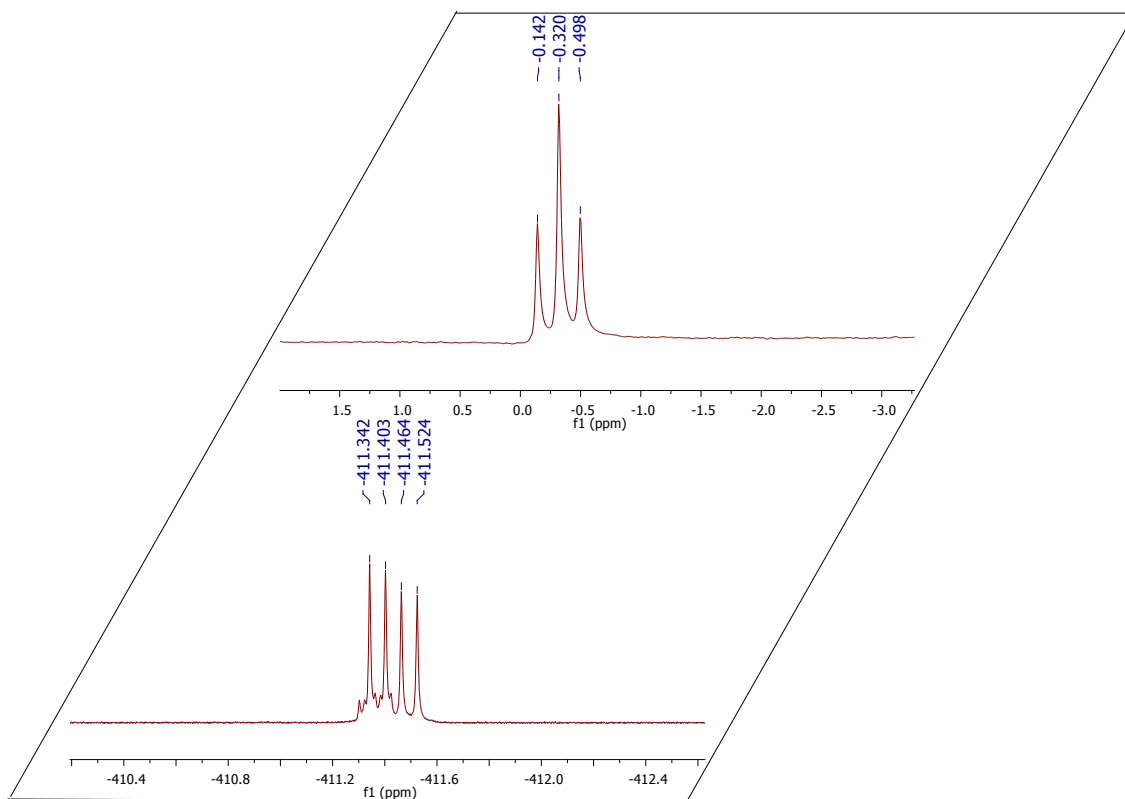

**Figure S9.** From top to bottom: fluorescence emission spectra for compounds **1** and **2** exciting at the respective long wavelength value (A); excitation spectra for **1** (B) and **2** (C) at the short and long wavelength emission band.

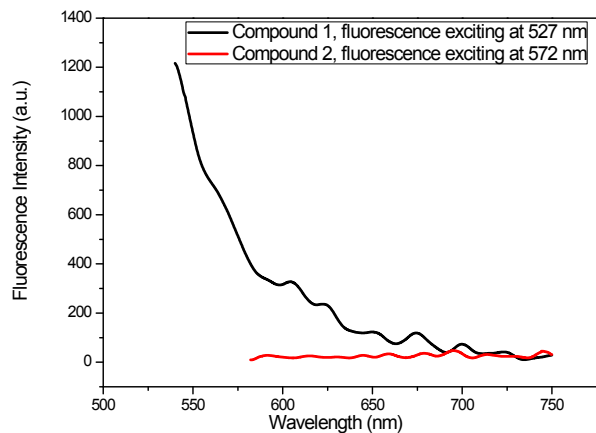

(A)

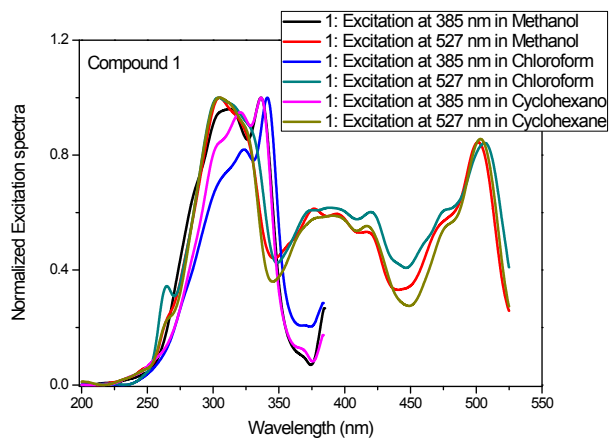

(B)



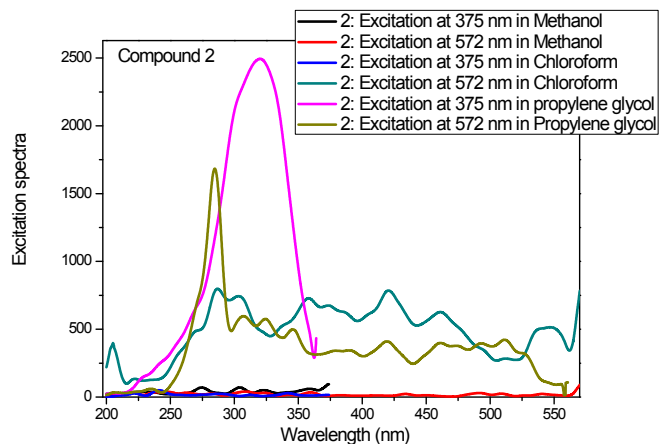

(C)

**Figure S10.** Computed UV-Vis spectra for **1** and **2** at TD-DFT: PBE0/6-31+G(d,p)/PCM-Methanol.

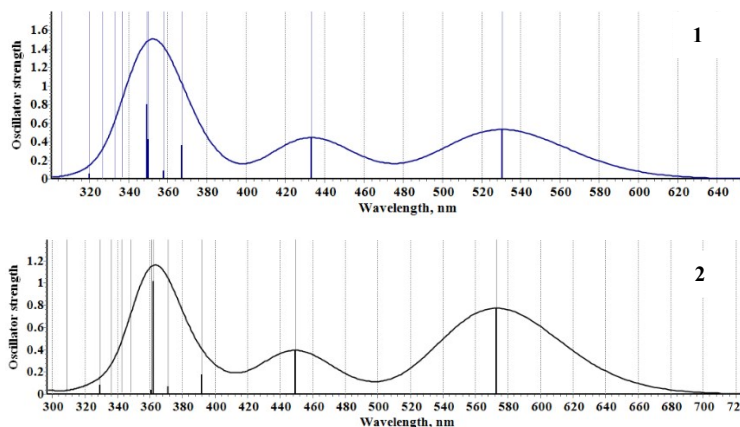

**Table S1.** Estimated coefficients  $y_0$ ,  $a_{SA}$ ,  $b_{SB}$ ,  $c_{SP}$  and  $d_{SdP}$  for  $\bar{\nu}_{abs}$ ,  $\bar{\nu}_{em}$ , and  $\Delta\bar{\nu}$  ( $\text{cm}^{-1}$ ) and multiple correlation coefficient ( $r$ ) for regression analysis of compound **2** in 16 solvents according to the Catalán solvent parameters {SA, SB, SP, SdP}.

| Observable        | $y_0$ ( $\text{cm}^{-1}$ ) | $a_{SA}$       | $b_{SB}$       | $c_{SP}$         | $d_{SdP}$     | $r$   |
|-------------------|----------------------------|----------------|----------------|------------------|---------------|-------|
| $\bar{\nu}_{abs}$ | $32278 \pm 314$            | $-193 \pm 149$ | $-82 \pm 143$  | $-612 \pm 447$   | $-48 \pm 113$ | 0.701 |
| $\bar{\nu}_{em}$  | $28608 \pm 215$            | $-75 \pm 102$  | $-125 \pm 97$  | $-1256 \pm 305$  | $-246 \pm 77$ | 0.914 |
| $\Delta\bar{\nu}$ | $4900 \pm 776$             | $670 \pm 369$  | $-224 \pm 353$ | $-1128 \pm 1104$ | $379 \pm 280$ | 0.742 |
